# Supplementary material
Source: publisher figshare collection journal article supplement (https://frontiersin.figshare.com/ndownloader/files/22893452)
Supplement: Supplementary file 1 [file 22893452]

Supplementary Material

Table S1: The taxon, sampling zone and number of replicates for each resource and consumers’ species included in the study.

|  | Taxon | Zone | Number of replicates |
| --- | --- | --- | --- |
| Consumers | *Diadumene cincta* | *Mytilus* | 6 |
| *Jassa* | 10 |
| *Jassa herdmani* | Intertidal | 1 |
| *Mytilus* | 9 |
| *Jassa* | 8 |
| Scour protection layer | 3 |
| Soft substrate | 5 |
| *Metridium senile* | *Mytilus* | 6 |
| *Jassa* | 7 |
| *Metridium* | 10 |
| Scour protection layer | 10 |
| Soft substrate | 9 |
| *Mytilus edulis* | Intertidal | 18 |
| *Mytilus* | 14 |
| *Metridium* | 5 |
| *Necora puber* | *Jassa* | 2 |
| *Metridium* | 5 |
| Soft substrate | 6 |
| *Ophiothrix fragilis* | *Mytilus* | 7 |
| *Jassa* | 10 |
| *Metridium* | 6 |
| *Pisidia longicornis* | *Mytilus* | 8 |
| *Metridium* | 1 |
| Scour protection layer | 13 |
| Soft substrate | 2 |
| Resources | Algae | Upper intertidal | 10 |
| Lower intertidal | 10 |
| Suspended particulate organic matter (SPOM) | ~1 m above the sea floor | 3 |
| ~3 m below the sea surface | 3 |
| Sediment organic matter | Soft substrate | 6 |
| Copepods | Water column | 3 |
| Crab larvae | Water column | 1 |
| Other larvae | Water column | 1 |

Table S2: Sample size-corrected standard ellipse area (SEAC - ‰2), eccentricity (E), angle of the ellipse (θ), mode of the Bayesian standard ellipse area (SEAB) and the lower and upper 95% credible intervals showing the uncertainty of SEAB (95% CI) of the consumer species collected at the different zones.

| Species | SEAc | E | θ | SEAB | 95 % CI |
| --- | --- | --- | --- | --- | --- |
| *Diadumene cincta* |  |  |  |  |  |
| *Mytilus* zone | 0.55 | 0.86 | -15.31 | 0.50 | 0.21 to 1.34 |
| *Jassa* zone | 0.24 | 0.87 | -2.74 | 0.15 | 0.08 to 0.30 |
| *Jassa herdmani* |  |  |  |  |  |
| *Mytilus* zone | 0.24 | 0.85 | 76.00 | 0.12 | 0.06 to 0.26 |
| *Jassa* zone | 0.11 | 0.68 | 41.95 | 0.10 | 0.04 to 0.22 |
| Scour protection layer | 0.01 | 1 | 17.84 | 0.06 | 0.02 to 0.25 |
| Soft substrate | 0.45 | 0.99 | -3.31 | 0.30 | 0.10 to 0.88 |
| *Metridium senile* |  |  |  |  |  |
| *Mytilus* zone | 0.29 | 0.99 | 24.61 | 0.42 | 0.20 to 1.14 |
| *Jassa* zone | 1.04 | 0.92 | 68.01 | 0.93 | 0.47 to 2.45 |
| *Metridium* zone | 0.41 | 0.99 | 13.28 | 0.38 | 0.20 to 0.79 |
| Scour protection layer | 1.28 | 0.91 | 25.38 | 0.67 | 0.34 to 1.36 |
| Soft substrate | 0.73 | 0.97 | 2.91 | 0.56 | 0.30 to 1.23 |
| *Mytilus edulis* |  |  |  |  |  |
| Intertidal zone | 0.73 | 0.95 | 5.54 | 0.64 | 0.42 to 1.09 |
| *Mytilus* zone | 0.23 | 0.79 | -15.7 | 0.18 | 0.10 to 0.31 |
| *Metridium* zone | 0.17 | 0.99 | -4.69 | 0.09 | 0.03 to 0.27 |
| *Necora puber* |  |  |  |  |  |
| *Metridium* zone | 1.32 | 0.66 | 11.25 | 0.87 | 0.30 to 2.49 |
| Soft substrate | 6.04 | 0.92 | -68.03 | 4.57 | 1.80 to 12.30 |
| *Ophiothrix fragilis* |  |  |  |  |  |
| *Mytilus* zone | 2.82 | 0.86 | 3.65 | 2.17 | 0.99 to 5.43 |
| *Jassa* zone | 8.10 | 0.93 | -9.08 | 5.50 | 2.81 to 11.34 |
| *Metridium* zone | 2.31 | 0.99 | -1.35 | 1.74 | 0.77 to 4.74 |
| *Pisidia longicornis* |  |  |  |  |  |
| *Mytilus* zone | 2.24 | 0.62 | -53.01 | 2.32 | 1.11 to 5.12 |
| Scour protection layer | 0.63 | 0.99 | 4.78 | 0.43 | 0.24 to 0.78 |

Table S3: Bayesian stable isotope ellipse (SEAB) probabilities that the ellipse area of the species in the column is smaller than the ellipse area of the species in the row. Numbers refer to the different species in the different zones: 1: *Diadumene cincta* in *Mytilus* zone, 2: *D. cincta* in *Jassa* zone, 3: *Jassa herdmani* in *Mytilus* zone, 4: *J. herdmani* in *Jassa* zone, 5: *J. herdmani* in scour protection layer (SPL), 6: *J. herdmani* in soft substrate, 7: *Metridium senile* in *Mytilus* zone, 8: *M. senile* in *Jassa* zone, 9: *M. senile* in *Metridium* zone, 10: *M. senile* in SPL, 11: *M. senile* in soft substrate, 12: *Mytilus edulis* in intertidal, 13: *M. edulis* in *Mytilus* zone, 14: *M. edulis* in *Metridium* zone, 15: *Necora puber* in *Metridium* zone, 16: *N. puber* in soft substrate, 17: *Ophiothrix fragilis* in *Mytilus* zone, 18: *O. fragilis* in *Jassa* zone, 19: *O. fragilis* in *Metridium* zone, 20: *Pisidia longicornis* in *Mytilus* zone and 21: *P. longicornis* in SPL. Red boxes represent SEAB probabilities ≥ 0.9.

|  | 1 | 2 | 3 | 4 | 5 | 6 | 7 | 8 | 9 | 10 | 11 | 12 | 13 | 14 | 15 | 16 | 17 | 18 | 19 | 20 | 21 |
| --- | --- | --- | --- | --- | --- | --- | --- | --- | --- | --- | --- | --- | --- | --- | --- | --- | --- | --- | --- | --- | --- |
| 1 |  |  |  |  |  |  |  |  |  |  |  |  |  |  |  |  |  |  |  |  |  |
| 2 | 0.08 |  |  |  |  |  |  |  |  |  |  |  |  |  |  |  |  |  |  |  |  |
| 3 | 0.08 | 0.51 |  |  |  |  |  |  |  |  |  |  |  |  |  |  |  |  |  |  |  |
| 4 | 0.00 | 0.05 | 0.05 |  |  |  |  |  |  |  |  |  |  |  |  |  |  |  |  |  |  |
| 5 | 0.02 | 0.11 | 0.12 | 0.47 |  |  |  |  |  |  |  |  |  |  |  |  |  |  |  |  |  |
| 6 | 0.37 | 0.83 | 0.83 | 0.99 | 0.96 |  |  |  |  |  |  |  |  |  |  |  |  |  |  |  |  |
| 7 | 0.53 | 0.94 | 0.93 | 1.00 | 0.98 | 0.66 |  |  |  |  |  |  |  |  |  |  |  |  |  |  |  |
| 8 | 0.90 | 1.00 | 1.00 | 1.00 | 1.00 | 0.94 | 0.89 |  |  |  |  |  |  |  |  |  |  |  |  |  |  |
| 9 | 0.48 | 0.94 | 0.94 | 1.00 | 0.98 | 0.63 | 0.45 | 0.06 |  |  |  |  |  |  |  |  |  |  |  |  |  |
| 10 | 0.96 | 1.00 | 1.00 | 1.00 | 1.00 | 0.97 | 0.95 | 0.68 | 0.99 |  |  |  |  |  |  |  |  |  |  |  |  |
| 11 | 0.76 | 0.99 | 0.99 | 1.00 | 0.99 | 0.83 | 0.74 | 0.23 | 0.80 | 0.10 |  |  |  |  |  |  |  |  |  |  |  |
| 12 | 0.79 | 1.00 | 0.99 | 1.00 | 0.99 | 0.87 | 0.77 | 0.21 | 0.86 | 0.07 | 0.53 |  |  |  |  |  |  |  |  |  |  |
| 13 | 0.06 | 0.50 | 0.49 | 0.97 | 0.89 | 0.15 | 0.05 | 0.00 | 0.04 | 0.00 | 0.00 | 0.00 |  |  |  |  |  |  |  |  |  |
| 14 | 0.04 | 0.22 | 0.22 | 0.74 | 0.72 | 0.07 | 0.03 | 0.00 | 0.03 | 0.00 | 0.01 | 0.00 | 0.20 |  |  |  |  |  |  |  |  |
| 15 | 0.91 | 1.00 | 1.00 | 1.00 | 1.00 | 0.94 | 0.90 | 0.56 | 0.94 | 0.40 | 0.76 | 0.80 | 1.00 | 1.00 |  |  |  |  |  |  |  |
| 16 | 1.00 | 1.00 | 1.00 | 1.00 | 1.00 | 1.00 | 1.00 | 1.00 | 1.00 | 1.00 | 1.00 | 1.00 | 1.00 | 1.00 | 1.00 |  |  |  |  |  |  |
| 17 | 1.00 | 1.00 | 1.00 | 1.00 | 1.00 | 1.00 | 1.00 | 0.96 | 1.00 | 0.91 | 1.00 | 1.00 | 1.00 | 1.00 | 0.92 | 0.07 |  |  |  |  |  |
| 18 | 1.00 | 1.00 | 1.00 | 1.00 | 1.00 | 1.00 | 1.00 | 1.00 | 1.00 | 1.00 | 1.00 | 1.00 | 1.00 | 1.00 | 1.00 | 0.73 | 0.99 |  |  |  |  |
| 19 | 0.99 | 1.00 | 1.00 | 1.00 | 1.00 | 0.99 | 0.99 | 0.89 | 1.00 | 0.81 | 0.98 | 0.99 | 1.00 | 1.00 | 0.84 | 0.04 | 0.34 | 0.01 |  |  |  |
| 20 | 0.99 | 1.00 | 1.00 | 1.00 | 1.00 | 0.99 | 0.99 | 0.91 | 1.00 | 0.84 | 0.98 | 1.00 | 1.00 | 1.00 | 0.86 | 0.04 | 0.35 | 0.00 | 0.52 |  |  |
| 21 | 0.70 | 0.99 | 0.99 | 1.00 | 0.99 | 0.81 | 0.67 | 0.14 | 0.76 | 0.05 | 0.40 | 0.36 | 1.00 | 0.99 | 0.13 | 0.00 | 0.00 | 0.00 | 0.01 | 0.00 |  |

Table S4: Mean and standard deviation (sd) of the potential contribution (%) of each resource to the diet of every species in the different zones as calculated by the Bayesian stable isotope mixing models, where SPL: scour protection layer.

| *Diadumene cincta*/*Mytilus* zone | | | | | | *Diadumene cincta*/*Jassa* zone | | | | | | |  | | |  | |  | |
| --- | --- | --- | --- | --- | --- | --- | --- | --- | --- | --- | --- | --- | --- | --- | --- | --- | --- | --- | --- |
| Resources | | **Mean (%)** | | | **SD (%)** | **Resources** | | | **Mean (%)** | | **SD (%)** | |  | | |  | |  | |
| Copepods | | 13.5 | | | 9.3 | Copepods | | | 10.1 | | 6.2 | |  | | |  | |  | |
| Crab larvae | | 13.6 | | | 9.0 | Crab larvae | | | 11.0 | | 6.5 | |  | | |  | |  | |
| SPOM | | **62.5** | | | 11.2 | SPOM | | | **71.9** | | 6.8 | |  | | |  | |  | |
| Other larvae | | 10.4 | | | 6.8 | Other larvae | | | 7.0 | | 4.3 | |  | | |  | |  | |
| *Necora puber*/*Metridium* zone | | | | | | ***Necora puber*/Soft substrate** | | | | | | |  | | |  | |  | |
| Resources | | **Mean (%)** | | | **SD (%)** | **Resources** | | | **Mean (%)** | | **SD (%)** | |  | | |  | |  | |
| Copepods | | 10 | | | 9.2 | Copepods | | | 10.6 | | 10.1 | |  | | |  | |  | |
| Crab larvae | | 7.3 | | | 7.3 | Crab larvae | | | 9.7 | | 9.3 | |  | | |  | |  | |
| Other larvae | | 16.6 | | | 15.4 | Other larvae | | | 15.2 | | 14.7 | |  | | |  | |  | |
| SPOM-bottom | | 5.4 | | | 5.1 | SPOM-bottom | | | 6.8 | | 6.6 | |  | | |  | |  | |
| SPOM-surface | | 5.5 | | | 5.3 | SPOM-surface | | | 6.3 | | 6.3 | |  | | |  | |  | |
| SOM | | - | | | - | SOM | | | 5.1 | | 4.4 | |  | | |  | |  | |
| *Pisidia longicornis* | | 6.3 | | | 6.1 | *Pisidia longicornis* | | | 7.0 | | 6.9 | |  | | |  | |  | |
| *Pilumnus hirtellus* | | **20.6** | | | 17.9 | *Pilumnus hirtellus* | | | 10.6 | | 10.8 | |  | | |  | |  | |
| Sponges | | 6.0 | | | 5.7 | Sponges | | | 6.8 | | 6.5 | |  | | |  | |  | |
| Mussels | | 8.8 | | | 8.1 | Mussels | | | 10.2 | | 9.8 | |  | | |  | |  | |
| Amphipods | | 17.1 | | | 16.1 | Amphipods | | | 14.0 | | 13.4 | |  | | |  | |  | |
| *Pisidia longicornis*/*Mytilus* zone | | | | | | ***Pisidia longicornis*/Scour protection layer** | | | | | | |  | | |  | |  | |
| Resources | | **Mean (%)** | | | **SD (%)** | **Resources** | | | **Mean (%)** | | **SD (%)** | |  | | |  | |  | |
| Copepods | | 10.7 | | | 8.2 | Copepods | | | 5.0 | | 3.6 | |  | | |  | |  | |
| Crab larvae | | 12.2 | | | 9.2 | Crab larvae | | | 5.6 | | 4.1 | |  | | |  | |  | |
| SPOM | | **68.5** | | | 11.7 | SPOM | | | 15.7 | | 6.4 | |  | | |  | |  | |
| Other larvae | | 8.6 | | | 6.1 | Other larvae | | | 4.4 | | 3.2 | |  | | |  | |  | |
| SOM | | - | | | - | SOM | | | **69.3** | | 5.4 | |  | | |  | |  | |
| *Mytilus edulis*/Intertidal | | | | | | ***Mytilus edulis*/*Mytilus* zone** | | | | | | | ***Mytilus edulis*/*Metridium* zone** | | | | | | |
| Resources | | **Mean (%)** | | | **SD (%)** | **Resources** | | | **Mean (%)** | | **SD (%)** | | **Resources** | | | **Mean (%)** | | **SD (%)** | |
| Copepods | | 4.1 | | | 3.0 | Copepods | | | 14.3 | | 8.9 | | Copepods | | | 21.8 | | 16.6 | |
| Crab larvae | | 4.7 | | | 3.4 | Crab larvae | | | 18.9 | | 10.5 | | Crab larvae | | | 26.6 | | 18.7 | |
| SPOM | | 20.7 | | | 6.2 | SPOM | | | **55.5** | | 5.9 | | SPOM | | | **30.9** | | 12.3 | |
| Other larvae | | 3.3 | | | 2.3 | Other larvae | | | 11.2 | | 6.5 | | Other larvae | | | 20.7 | | 13.4 | |
| Macroalgae | | **67.2** | | | 3.9 | Macroalgae | | | - | | - | | Macroalgae | | | - | | - | |
| Ophiothrix fragilis/Mytilus zone | | | | | | **Ophiothrix fragilis/Jassa zone** | | | | | | | **Ophiothrix fragilis/Metridium zone** | | | | | | |
| Resources | | **Mean (%)** | | | **SD (%)** | **Resources** | | | **Mean (%)** | | **SD (%)** | | **Resources** | | | **Mean (%)** | | **SD (%)** | |
| Copepods | | 14.7 | | | 12.0 | Copepods | | | 13.3 | | 11.6 | | Copepods | | | 19.5 | | 16.5 | |
| Crab larvae | | 17.9 | | | 14.5 | Crab larvae | | | 16.3 | | 14.5 | | Crab larvae | | | 25.0 | | 19.4 | |
| SPOM | | **55.2** | | | 17.4 | SPOM | | | **59.0** | | 20.1 | | SPOM | | | **31.6** | | 17.6 | |
| Other larvae | | 12.2 | | | 9.3 | Other larvae | | | 11.5 | | 10.0 | | Other larvae | | | 23.9 | | 18.3 | |
| *Jassa herdmani*/*Mytilus* zone | | | | ***Jassa herdmani*/*Jassa* zone** | | | | | | ***Jassa herdmani*/Scour protection layer** | | | | | ***Jassa herdmani*/Soft substrate** | | | | | |  | |  | |  |
| Resource | **Mean (%)** | | **SD (%)** | **Resource** | | | **Mean (%)** | **SD (%)** | | **Resource** | | **Mean (%)** | | **SD (%)** | **Resource** | | **Mean (%)** | | **SD (%)** | |  | |  | |  |
| SPOM-bottom | 14.8 | | 9.1 | SPOM-bottom | | | 15.0 | 9.1 | | SPOM-bottom | | 15.2 | | 12.3 | SPOM-bottom | | 9.9 | | 8.6 | |  | |  | |  |
| SPOM-surface | 24.0 | | 10.3 | SPOM-surface | | | 22.2 | 10.3 | | SPOM-surface | | 14.9 | | 12.3 | SPOM-surface | | 7.8 | | 6.5 | |  | |  | |  |
| Zooplankton | **61.2** | | 9.8 | Zooplankton | | | **62.8** | 10.4 | | Zooplankton | | **38.9** | | 13.0 | Zooplankton | | **41.8** | | 17.4 | |  | |  | |  |
| SOM | - | | - | SOM | | | - | - | | SOM | | 31.0 | | 18.0 | SOM | | 40.5 | | 20.8 | |  | |  | |  |
| *Metridium senile*/*Mytilus* zone | | | | ***Metridium senile*/*Jassa* zone** | | | | | | ***Metridium senile*/*Metridium* zone** | | | | | ***Metridium senile*/Scour protection layer** | | | | | | ***Metridium senile*/Soft substrate** | | | | |
| Resource | **Mean (%)** | | **SD (%)** | **Resource** | | | **Mean (%)** | **SD (%)** | | **Resource** | | **Mean (%)** | | **SD (%)** | **Resource** | | **Mean (%)** | | **SD (%)** | | **Resource** | **Mean (%)** | | **SD (%)** | |
| SPOM | **61.1** | | 13.1 | SPOM | | | **70.3** | 9.8 | | SPOM | | 40.7 | | 12.9 | SPOM | | **56.7** | | 12.7 | | SPOM | **61.9** | | 13.1 | |
| Zooplankton | 38.9 | | 13.1 | Zooplankton | | | 29.7 | 9.8 | | Zooplankton | | **59.3** | | 12.9 | Zooplankton | | 39.7 | | 12.2 | | Zooplankton | 34.8 | | 12.6 | |
| SOM | - | | - | SOM | | | - | - | | SOM | | - | | - | SOM | | 3.6 | | 2.7 | | SOM | 3.3 | | 2.8 | |
